# Supplementary material for: Regulation of cellular quiescence by YAP/TAZ and Cyclin E1 in colon cancer cells: Implication in chemoresistance and cancer relapse
Source: PubMed Central journal article supplement (PMC5302946; doi:10.18632/oncotarget.11057), 2016-08-04
Supplement: oncotarget-07-56699-s001.pdf [file oncotarget-07-56699-s001.pdf]

## Regulation of cellular quiescence by YAP/TAZ and Cyclin E1 in colon cancer cells: Implication in chemoresistance and cancer relapse

### Supplementary Materials

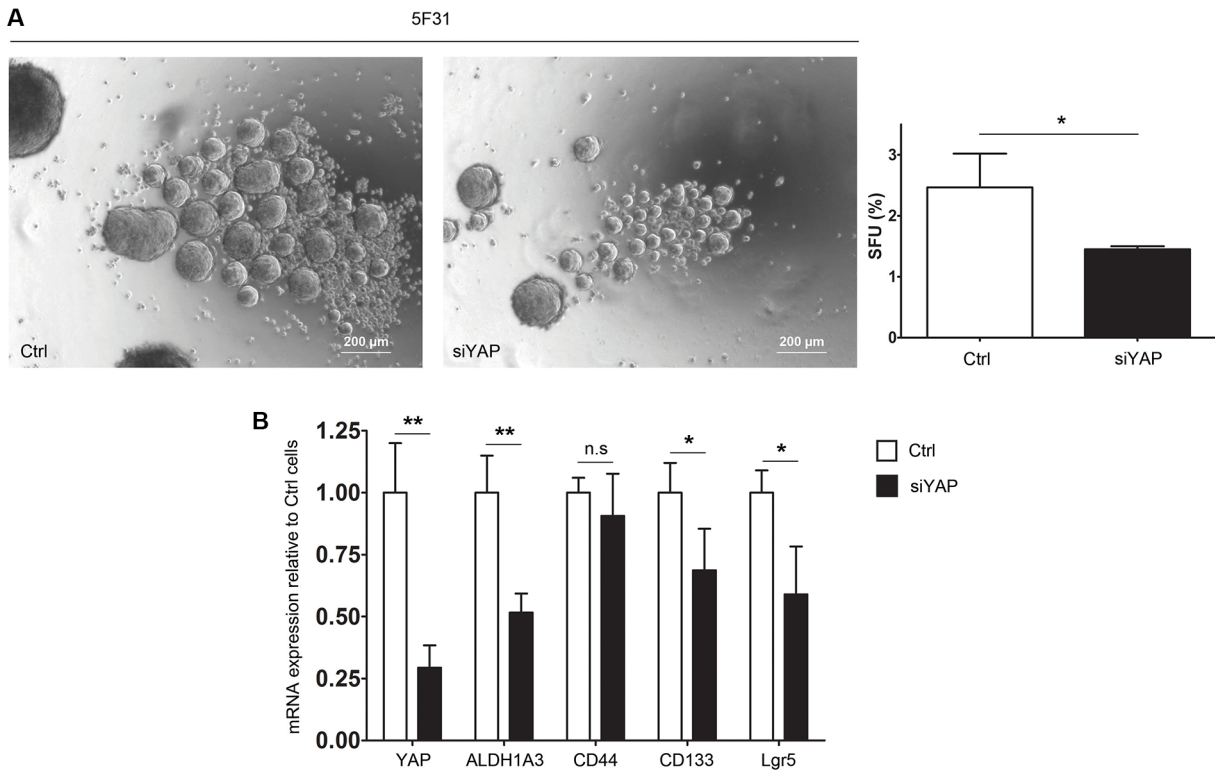

**Supplementary Figure S1: YAP knock-down alleviates stemness traits in 5F31 cells.** Sphere Forming Unit (SFU) assay of Control (Ctrl) and YAP-silenced 5F31 cells performed one week after transfection. SFU is the ratio of the number of spheres formed *per* the number of cells seeded per well. (A) Pictures were taken at 20× magnification. (B) Expression of the transcripts encoding YAP, ALDH1A3, CD44, CD133 and Lgr5 after YAP silencing.

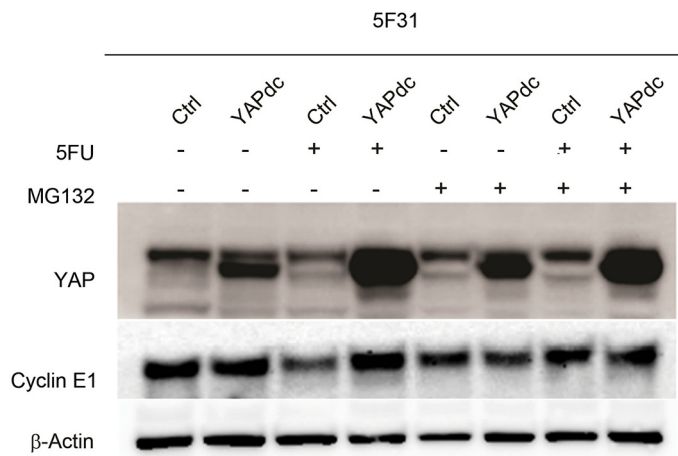

**Supplementary Figure S2: Proteasome-dependent degradation of YAP and Cyclin E1 in 5F31 cells after 5FU-treatment.** Western blot analysis of YAP and Cyclin E1 in control (Ctrl) and YAPdc-transfected 5F31 cells cultured for 96 hours in the presence or absence of 5FU and/or pretreatment with MG132 (1  $\mu$ M for 8 hours).

**Supplementary Table S1: Clinical and pathological features of metastatic liver samples correlated to YAP-TAZ expression**

|                           | YAP-TAZ low | YAP-TAZ high | <i>p</i> |
|---------------------------|-------------|--------------|----------|
| Number of patients        | 42          | 28           |          |
| Age at surgery            |             |              |          |
| < 60 years                | 21 (50%)    | 8 (28.6%)    | 0.075    |
| > 60 years                | 21 (50%)    | 20 (71.4%)   |          |
| Primary tumor site        |             |              |          |
| Right colon               | 8 (19%)     | 8 (28.6%)    | 0.249    |
| Left colon                | 23 (54.8%)  | 17 (60.7%)   |          |
| Rectum                    | 11 (26.2%)  | 3 (10.7%)    |          |
| Synchronous metastasis    |             |              |          |
| Yes                       | 13 (31%)    | 13 (48.1%)   | 0.150    |
| No                        | 29 (69%)    | 15 (51.9%)   |          |
| Bilobar metastasis        |             |              |          |
| Yes                       | 2 (4.8%)    | 1 (3.6%)     | 0.810    |
| No                        | 40 (95.2%)  | 27 (96.4%)   |          |
| T                         |             |              |          |
| Tis. T1. T2               | 7 (21.2%)   | 3 (13.6%)    | 0.475    |
| T3. T4                    | 26 (78.8%)  | 19 (86.4%)   |          |
| Tx                        | 9 (11.9%)   | 6 (3.5%)     |          |
| N                         |             |              |          |
| N0                        | 19 (45.2%)  | 10 (35.7%)   | 0.678    |
| N+                        | 14 (33.3%)  | 12 (42.9%)   |          |
| Nx                        | 9 (21.4%)   | 6 (21.4%)    |          |
| Neo adjuvant chemotherapy | 17 (40.5%)  | 17 (60.7%)   | 0.097    |
| FOLFOX                    | 11          | 9            | 0.589    |
| FOLFIRI                   | 6           | 8            | 0.143    |
| XELODA                    | 2           | 0            | 0.241    |
| With bevacizumab          | 6 (13.3%)   | 9 (28.6%)    | 0.074    |
| Without bevacizumab       | 36 (85.7%)  | 19 (71.4%)   |          |

\*Values are median (interquartile range).

**Supplementary Table S2: Univariate disease free survival analysis**

|                           | Number of patients | DFS (months)* | Log-rank <i>p</i> value |
|---------------------------|--------------------|---------------|-------------------------|
| YAP-TAZ                   |                    |               |                         |
| High                      | 28 (40%)           | 15 [8–31]     | <b>0.008</b>            |
| Low                       | 42 (60%)           | 30.5 [14–60]  |                         |
| Age at surgery            |                    |               |                         |
| < 60 (Years)              | 29 (41.4%)         | 28 [9–45]     | 0.832                   |
| > 60 (Years)              | 41 (58.6%)         | 23 [13–49]    |                         |
| Primary tumor site        |                    |               |                         |
| Right colon               | 16 (22.9%)         | 29 [14.5–53]  | 0.168                   |
| Left colon                | 40 (57.1%)         | 16.5 [8–35]   |                         |
| Rectum                    | 14 (20%)           | 37.5 [20–60]  |                         |
| Synchronous metastasis    |                    |               |                         |
| Yes                       | 26 (37.1%)         | 15 [8–45]     | <b>0.024</b>            |
| No                        | 44 (62.9%)         | 29 [15–60]    |                         |
| Bilobar metastasis        |                    |               |                         |
| Yes                       | 3 (4.3%)           | 23 [9–45]     | 0.762                   |
| No                        | 67 (95.7%)         | 24 [10–53]    |                         |
| T                         |                    |               |                         |
| Tis. T1. T2               | 10 (18.1%)         | 19 [14–49]    | 0.901                   |
| T3. T4                    | 45 (81.9%)         | 24 [9–45]     |                         |
| N                         |                    |               |                         |
| N0                        | 29 (52.7%)         | 32 [15–59]    | 0.098                   |
| N+                        | 26 (47.3%)         | 15 [8–31]     |                         |
| Neo adjuvant chemotherapy |                    |               |                         |
| Yes                       | 34 (48.6%)         | 15 [8–35]     | <b>0.040</b>            |
| No                        | 36 (51.4%)         | 30 [15–60]    |                         |

\*Values are median [interquartile range].

**Supplementary Table S3: Multivariate disease free survival analysis**

|                          | <i>p</i> value | Hazard ratio | 95% confidence interval |
|--------------------------|----------------|--------------|-------------------------|
| <b>YAP-TAZ</b>           | <b>0.045</b>   | <b>1.979</b> | <b>1.014 to 3.860</b>   |
| Synchronous metastasis   | 0.115          | 1.690        | 0.880 to 3.248          |
| Neoadjuvant chemotherapy | 0.184          | 1.570        | 0.807 to 3.054          |

Introduction when *p* univariate analysis, < 0.05.

**Supplementary Table S4 : Univariate overall survival analysis**

|                           | Number of patients | OS (months)* | Log-rank <i>p</i> value |
|---------------------------|--------------------|--------------|-------------------------|
| YAP-TAZ                   |                    |              |                         |
| High                      | 28 (40%)           | 31 [21–61]   | <b>0.040</b>            |
| Low                       | 42 (60%)           | 58 [32–73]   |                         |
| Age at surgery            |                    |              | 0.580                   |
| < 60 (Years)              | 29 (41.4%)         | 54 [32–69]   |                         |
| > 60 (Years)              | 41 (58.6%)         | 44 [29–67]   |                         |
| Primary tumor site        |                    |              | 0.409                   |
| Right colon               | 16 (22.9%)         | 44 [22–67]   |                         |
| Left colon                | 40 (57.1%)         | 36 [27–65]   |                         |
| Rectum                    | 14 (20%)           | 62 [44–77]   |                         |
| Synchronous metastasis    |                    |              | 0.419                   |
| Yes                       | 26 (37.1%)         | 54 [22–61]   |                         |
| No                        | 44 (62.9%)         | 50 [31–69]   |                         |
| Bilobar metastasis        |                    |              | 0.514                   |
| Yes                       | 3 (4.3%)           | 77 [12–79]   |                         |
| No                        | 67 (95.7%)         | 50 [29–68]   |                         |
| T                         |                    |              | 0.571                   |
| Tis. T1. T2               | 10 (18.1%)         | 57 [22–73]   |                         |
| T3. T4                    | 45 (81.9%)         | 35 [29–67]   |                         |
| N                         |                    |              | 0.109                   |
| N0                        | 29 (52.7%)         | 54 [43–69]   |                         |
| N+                        | 26 (47.3%)         | 57 [30–73]   |                         |
| Neo adjuvant chemotherapy |                    |              | 0.386                   |
| Yes                       | 34 (48.6%)         | 35 [21–69]   |                         |
| No                        | 36 (51.4%)         | 53 [31–69]   |                         |

\*Values are median [interquartile range].

**Supplementary Table S5: Cox model regression for overall survival analysis**

|         | <i>p</i> value | Hazard ratio | 95% confidence interval |
|---------|----------------|--------------|-------------------------|
| YAP-TAZ | <b>0.045</b>   | <b>2.058</b> | <b>1.018 to 4.161</b>   |

introduction when *p* univariate analysis, < 0.05.
